# Supplementary material for: Prediction of plant diversity under different stocking rates based on functional traits of constructive species in a desert steppe, northern China
Source: Frontiers journal article supplement (doi:10.3389/fevo.2022.865703), 2022-07-25
Supplement: Data_Sheet_1.docx [file Data_Sheet_1.docx]

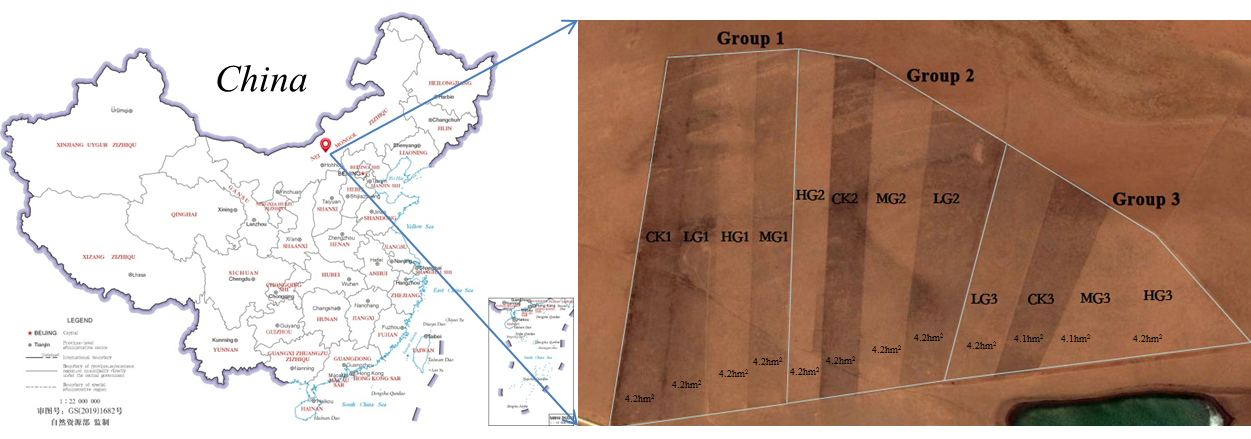


Fig. S1 Schematic diagram of studied site

Note: CK: without grazing, LG: 0.91 sheep unit·hm-2∙half∙year-1, MG: 1.82 sheep unit·hm-2∙half∙year-1, HG: 2.71 sheep unit·hm-2∙half∙year-1)

Fig. S2 The SDR dynamics of dominant and sub-dominant species during 2004-2017

Note: The correlations between the SDR of sub-dominant species and that of *S. breviflora* was given in subgraphs. *, *P* < 0.05; **, *P* < 0.01.





Fig. S3 Pearson’s correlation analysis between the functional traits of *S. breviflora*, population, community, and species diversity.

Note: *, *P* < 0.05; **, *P* < 0.01.
